# Supplementary material for: Scutellaria petiolata Hemsl. ex Lace & Prain (Lamiaceae).: A New Insight in Biomedical Therapies
Source: MDPI journal article supplement (doi:10.3390/antiox11081446), 2022-07-26

## Supporting Information

# *Scutellaria petiolata* Hemsl. ex Lace & Prain (Lamiaceae).: A New Insight in Biomedical Therapies

Sidra Mubin<sup>1</sup>, Najeeb Ur Rehman<sup>2</sup>, Waheed Murad<sup>3</sup>, Muddaser Shah<sup>2,3\*</sup>,  
Ahmed Al-Harrasi<sup>2\*</sup> and Rabia Afza<sup>1\*</sup>

<sup>1</sup>Department of Botany, Hazara University Mansehra, Mansehra 21310, Pakistan; shahhu123@gmail.com (SM); ethnopk@gmail.com(RA).

<sup>2</sup>Natural and Medical Sciences Research Center, University of Nizwa, P.O. Box 33, Birkat Al Mauz, Nizwa 616, Oman; najeeb@unizwa.edu.om (N.U.R)

<sup>3</sup>Department of Botany, Abdul Wali Khan University Mardan, Mardan 23200, Pakistan; waheedmurad@awkum.edu.pk (W.M)

\*Correspondance: muddasersshah@awkum.edu.pk (MS) aharrasi@unizwa.edu.om(A.A.H), rabiaafza@hu.edu.pk(RA),

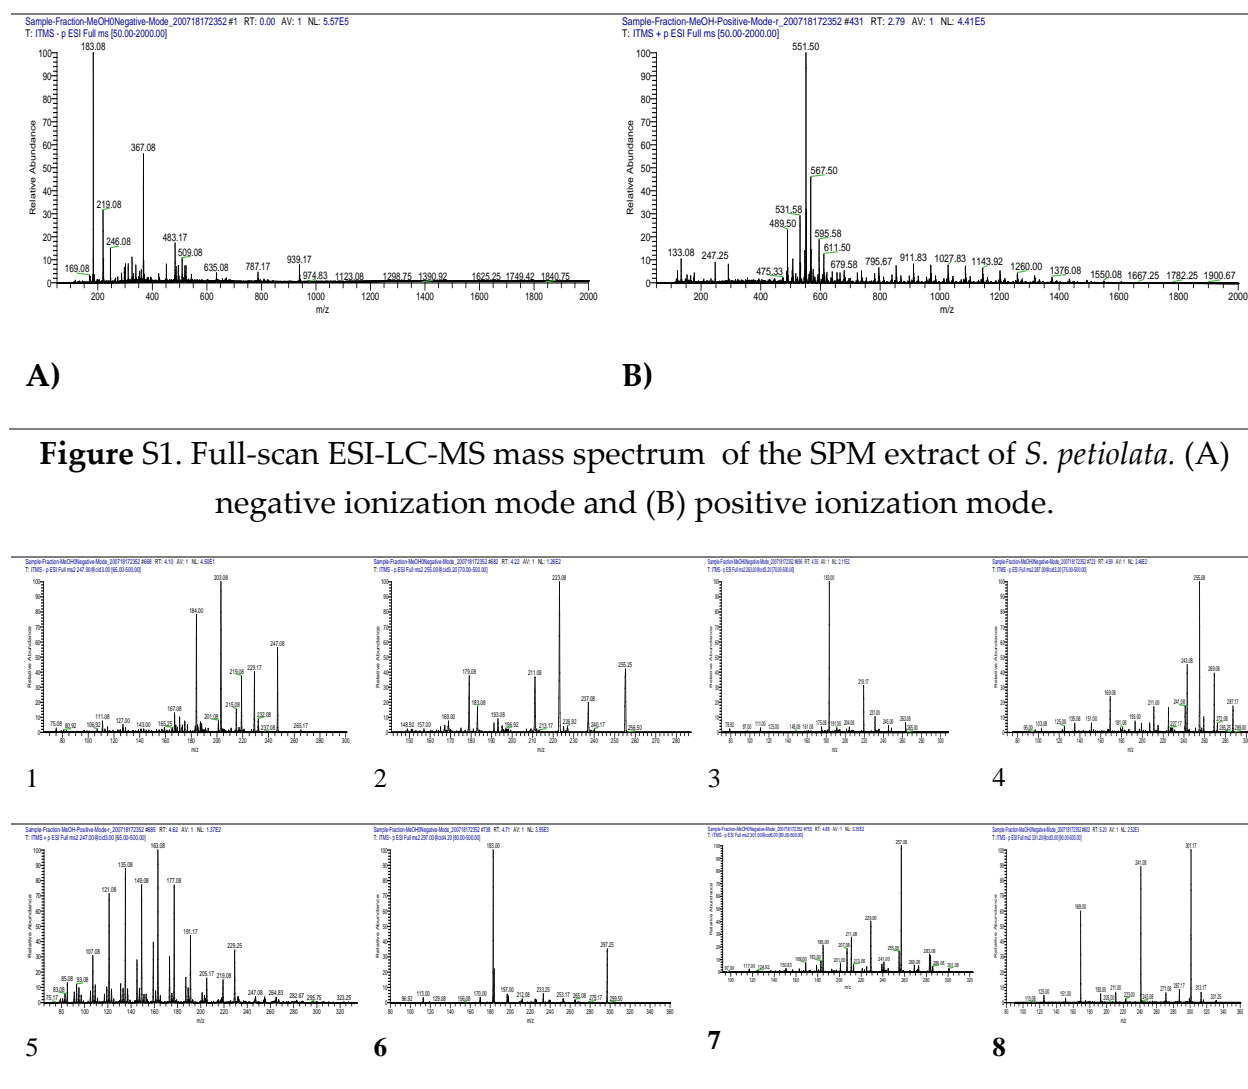

Supplement: s1 [file s1]
